# Supplementary material
Source: Copernicus journal article supplement (doi:10.5194/egusphere-2026-1247)
Supplement: Supplementary file 1 [file egusphere-2026-1247-supplement.pdf]

# Using artificial intelligence to monitor live fuel moisture content across France, based on a high resolution land surface analysis - Supplements

Yann Baehr<sup>1</sup>, Pierre Vanderbecken<sup>1</sup>, Bertrand Bonan<sup>1</sup>, Catherine Robert<sup>2</sup>, Mathieu Regimbeau<sup>3</sup>, François Pimont<sup>4</sup>, Kevyn Raynal<sup>4</sup>, Xiangzhuo Liu<sup>5</sup>, Remi Savazzi<sup>7</sup>, Moncef Garouani<sup>8</sup>, Josiane Mothe<sup>9</sup>, Nemesio Rodriguez-Fernandez<sup>6</sup>, Lionel Jarlan<sup>6</sup>, and Jean-Christophe Calvet<sup>1</sup>

<sup>1</sup>Météo-France, CNRS, Univ. Toulouse, CNRM, Toulouse, France

<sup>2</sup>Météo-France, Direction des Opérations pour la Prévision, Coordination nationale feux de végétation, Toulouse, France

<sup>3</sup>Météo-France, Direction des Services Météorologiques, Division Agrométéorologie, Toulouse, France

<sup>4</sup>INRAE, URFM, Avignon, France

<sup>5</sup>INRAE, UMR1391 ISPA, Villenave d'Ornon, France

<sup>7</sup>ONF, pôle national DFCI, Direction territoriale Midi-Méditerranée, Aix-en-Provence, France

<sup>6</sup>CESBIO, University of Toulouse, IRD/CNRS/UPS/CNES, Toulouse, France

<sup>8</sup>IRIT, Univ. Toulouse Capitole, UMR5505 CNRS, Toulouse, France

<sup>9</sup>IRIT, UT2J, Univ. de Toulouse, UMR5505 CNRS, Toulouse, France

**Correspondence:** Jean-Christophe Calvet (jean-christophe.calvet@meteo.fr)

This Supplementary Material provides additional figures, tables, and methodological details supporting the results presented in the main article.

## Supplement 1: ONF field sites and species

5 Full description of the ONF (*Réseau Hydrique*) monitoring network, including site coordinates, vegetation types, and species sampled. Table S1 lists all sites and their corresponding dominant species.

**Table S1.** List of georeferenced sites of the *Réseau Hydrique* available in the database. The site code provides an identifier of the form “DmSn” where m is the “département” number (i.e. administrative county) and n, the site number within a “département”.

| Site Code | Site Name          | X(°) | Y(°)  | Sampled Species                                           | Sample size | Period    | RMSE (%) | KGE   | NSE   | R    |
|-----------|--------------------|------|-------|-----------------------------------------------------------|-------------|-----------|----------|-------|-------|------|
| D01S1     | Parves et Nattages | 5.75 | 48.70 | <i>Coronilla emerus</i><br><i>Rubus ulmifolius</i>        | 14          | 2024      | 21.12    | -0.06 | -3.18 | 0.73 |
| D04S1     | Les Adrechs        | 5.92 | 44.03 | <i>Genista cinerea</i> ,<br><i>Rosmarinus officinalis</i> | 846         | 1996-2024 | 8.29     | 0.92  | 0.91  | 0.97 |
| D04S2     | Les Pailles        | 6.50 | 43.98 | <i>Buxus sempervirens</i> ,<br><i>Genista cinerea</i>     | 740         | 1996-2024 | 11.89    | 0.80  | 0.61  | 0.94 |

*Continued on next page*

| Site Code | Site Name            | X(°) | Y(°)  | Sampled Species                                                                                                 | Sample size | Period    | RMSE (%) | KGE  | NSE   | R    |
|-----------|----------------------|------|-------|-----------------------------------------------------------------------------------------------------------------|-------------|-----------|----------|------|-------|------|
| D05S1     | Théus                | 6.17 | 44.48 | <i>Genista cinerea</i> ,<br><i>Juniperus communis</i>                                                           | 18          | 2024      | 11.33    | 0.88 | 0.77  | 0.99 |
| D06S1     | Lou Lambert          | 7.34 | 43.83 | <i>Juniperus oxycedrus</i> ,<br><i>Rosmarinus officinalis</i>                                                   | 894         | 1996-2024 | 14.82    | 0.74 | 0.54  | 0.88 |
| D06S2     | Barbossi             | 6.90 | 43.53 | <i>Acacia dealbata</i> ,<br><i>Cistus monspeliensis</i>                                                         | 889         | 1996-2024 | 17.75    | 0.39 | -0.01 | 0.62 |
| D06S3     | Mouans-Sartoux       | 6.93 | 43.60 | <i>Cistus salviifolius</i> ,<br><i>Erica arborea</i>                                                            | 22          | 2024      | 17.30    | 0.55 | -0.37 | 0.76 |
| D06S4     | Carros               | 7.19 | 43.78 | <i>Cistus albidus</i> ,<br><i>Rosmarinus officinalis</i>                                                        | 62          | 2022-2024 | 13.95    | 0.54 | 0.73  | 0.95 |
| D07S1     | Bois Sauvage         | 4.46 | 44.44 | <i>Buxus sempervirens</i> ,<br><i>Coronilla emerus</i><br><i>Arbutus unedo</i>                                  | 229         | 2011-2024 | 10.12    | 0.76 | 0.75  | 0.87 |
| D07S2     | Annonay              | 4.63 | 45.22 | <i>Calluna vulgaris</i> ,<br><i>Genista purgans</i> ,<br><i>Arbutus unedo</i> ,<br><i>Erica scoparia</i>        | 426         | 1996-2024 | 34.46    | 0.42 | -5.34 | 0.87 |
| D09S1     | Tarascon sur Ariège  | 1.59 | 42.86 | <i>Genista scoparius</i> ,<br><i>Rosa canina</i>                                                                | 28          | 2023-2024 | 13.18    | 0.54 | 0.02  | 0.85 |
| D11S1     | Col de Nouvelle      | 2.79 | 42.91 | <i>Quercus coccifera</i> ,<br><i>Rosmarinus officinalis</i>                                                     | 904         | 1996-2024 | 9.95     | 0.51 | 0.63  | 0.92 |
| D11S2     | Le Chemin des Bornes | 2.92 | 43.12 | <i>Cistus monspeliensis</i> ,<br><i>Erica scoparia</i>                                                          | 911         | 1996-2024 | 15.85    | 0.18 | 0.26  | 0.60 |
| D11S3     | La coumelle          | 2.68 | 43.08 | <i>Quercus coccifera</i> ,<br><i>Rosmarinus officinalis</i>                                                     | 164         | 2018-2024 | 6.10     | 0.56 | 0.55  | 0.77 |
| D11S4     | Gruissan             | 3.06 | 43.12 | <i>Quercus coccifera</i> ,<br><i>Rosmarinus officinalis</i>                                                     | 78          | 2022-2024 | 12.30    | 0.31 | 0.06  | 0.66 |
| D11S5     | Pouzols              | 2.79 | 43.28 | <i>Cistus albidus</i> ,<br><i>Quercus coccifera</i>                                                             | 68          | 2022-2024 | 17.23    | 0.37 | -0.52 | 0.74 |
| D12S1     | Millau               | 3.18 | 44.12 | <i>Arctostaphylos uva-ursi</i> ,<br><i>Juniperus communis</i>                                                   | 17          | 2023-2024 | 9.98     | 0.88 | 0.58  | 0.93 |
| D12S2     | Fayet                | 2.96 | 43.80 | <i>Cistus salviifolius</i> ,<br><i>Erica arborea</i>                                                            | 12          | 2024      | 13.35    | 0.62 | 0.34  | 0.66 |
| D13S1     | La Charlotte         | 5.06 | 43.69 | <i>Quercus coccifera</i> ,<br><i>Rosmarinus officinalis</i> ,<br><i>Cistus albidus</i> ,<br><i>Quercus ilex</i> | 1047        | 1996-2024 | 16.48    | 0.45 | 0.36  | 0.68 |
| D13S2     | Le Romaron           | 5.16 | 43.35 | <i>Quercus coccifera</i> ,<br><i>Rosmarinus officinalis</i>                                                     | 895         | 1997-2024 | 8.09     | 0.75 | 0.45  | 0.76 |
| D13S3     | Bouc-Bel-Air         | 5.44 | 43.46 | <i>Cistus albidus</i> ,<br><i>Rosmarinus officinalis</i>                                                        | 62          | 2022-2024 | 20.58    | 0.22 | -0.28 | 0.23 |

Continued on next page

| Site Code | Site Name            | X(°)  | Y(°)  | Sampled Species                                                                                                    | Sample size | Period    | RMSE (%) | KGE   | NSE    | R     |
|-----------|----------------------|-------|-------|--------------------------------------------------------------------------------------------------------------------|-------------|-----------|----------|-------|--------|-------|
| D13S4     | Cassis               | 5.57  | 43.21 | <i>Cistus albidus</i> ,<br><i>Rosmarinus officinalis</i>                                                           | 64          | 2022-2024 | 12.92    | 0.61  | 0.72   | 0.92  |
| D15S1     | Ruynes en Margeride  | 3.22  | 44.99 | <i>Cytisus scoparius</i> ,<br><i>Juniperus communis</i>                                                            | 12          | 2024      | 32.90    | -0.07 | -1.14  | 0.09  |
| D16S1     | Forêt de la braconne | 0.29  | 45.78 | <i>Erica scoparia</i> ,<br><i>Spiraea hypericifolia</i><br><i>Prunus spinosa</i> ,<br><i>Spiraea hypericifolia</i> | 34          | 2023-2024 | 14.52    | 0.83  | 0.62   | 0.91  |
| D16S4     | Rougnac              | 0.38  | 45.54 | <i>Calluna vulgaris</i> ,<br><i>Erica scoparia</i>                                                                 | 20          | 2024      | 56.27    | 0.36  | -3.33  | 0.43  |
| D17S1     | Forêt de la coubre   | -1.19 | 45.71 | <i>Cistus salvifolius</i> ,<br><i>Cytisus scoparius</i>                                                            | 36          | 2023-2024 | 36.59    | 0.56  | -0.78  | 0.89  |
| D21S1     | Châtillon            | 4.52  | 47.86 | <i>Crataegus monogyna</i> ,<br><i>Ligustrum vulgare</i>                                                            | 13          | 2024      | 27.52    | -0.22 | -1.76  | -0.03 |
| D24S1     | Montpon-Ménéstérol   | 0.17  | 45.05 | <i>Calluna vulgaris</i> ,<br><i>Erica scoparia</i>                                                                 | 20          | 2024      | 30.74    | 0.59  | -2.66  | 0.93  |
| D24S2     | Chalagnac            | 0.67  | 45.10 | <i>Juniperus communis</i> ,<br><i>Ligustrum vulgare</i>                                                            | 16          | 2024      | 21.62    | -3.24 | -19.75 | 0.80  |
| D26S2     | Véronne              | 5.19  | 44.71 | <i>Amelanchier lamarckii</i> ,<br><i>Genista scoparius</i>                                                         | 18          | 2024      | 30.93    | -0.57 | -14.36 | 0.79  |
| D29S2     | Monts d'Arrée        | -4.00 | 48.36 | <i>Cytisus scoparius</i> ,<br><i>Erica cinerea</i>                                                                 | 14          | 2024      | 48.64    | -0.69 | -4.53  | -0.49 |
| D2AS1     | Salario              | 8.70  | 41.92 | <i>Cistus monspeliensis</i> ,<br><i>Erica arborea</i>                                                              | 963         | 1996-2024 | 13.89    | 0.62  | 0.59   | 0.77  |
| D2AS2     | FT Valle Mala        | 9.00  | 41.73 | <i>Arbutus unedo</i> ,<br><i>Erica arborea</i>                                                                     | 754         | 2000-2024 | 8.72     | 0.78  | 0.59   | 0.80  |
| D2AS3     | Lecci                | 9.32  | 41.65 | <i>Cistus monspeliensis</i> ,<br><i>Erica arborea</i>                                                              | 339         | 2012-2024 | 20.18    | 0.50  | 0.21   | 0.67  |
| D2AS4     | Figari               | 9.10  | 41.47 | <i>Arbutus unedo</i> ,<br><i>Cistus monspeliensis</i>                                                              | 52          | 2023-2024 | 15.33    | 0.25  | 0.00   | 0.38  |
| D2BS1     | Lancone C            | 9.41  | 42.64 | <i>Cistus monspeliensis</i> ,<br><i>Erica arborea</i>                                                              | 22          | 2024      | 20.91    | 0.55  | 0.26   | 0.87  |
| D2BS2     | Quilico              | 9.17  | 42.33 | <i>Cistus monspeliensis</i> ,<br><i>Erica arborea</i>                                                              | 766         | 2000-2024 | 15.30    | 0.13  | -1.80  | 0.25  |
| D2BS3     | Bonifatu             | 8.84  | 42.44 | <i>Cistus monspeliensis</i> ,<br><i>Erica arborea</i>                                                              | 777         | 1997-2024 | 20.53    | 0.57  | -0.70  | 0.75  |
| D2BS4     | Aéroport de Calvi    | 8.80  | 42.52 | <i>Cistus monspeliensis</i> ,<br><i>Erica arborea</i>                                                              | 60          | 2022-2024 | 14.26    | 0.33  | 0.24   | 0.57  |
| D2BS5     | Bocca di Vezzu       | 9.14  | 42.66 | <i>Cistus monspeliensis</i> ,<br><i>Erica arborea</i>                                                              | 80          | 2022-2024 | 17.47    | 0.43  | 0.41   | 0.64  |
| D2BS6     | Serra-di-Fiumorbo    | 9.36  | 41.99 | <i>Arbutus unedo</i> ,                                                                                             | 68          | 2022-2024 | 16.53    | 0.60  | 0.10   | 0.81  |

Continued on next page

| Site Code | Site Name             | X(°)  | Y(°)  | Sampled Species                                                                                                                       | Sample size | Period    | RMSE (%) | KGE   | NSE   | R     |
|-----------|-----------------------|-------|-------|---------------------------------------------------------------------------------------------------------------------------------------|-------------|-----------|----------|-------|-------|-------|
| D30S1     | Roc du Bajanet        | 4.01  | 44.22 | <i>Cistus monspeliensis</i><br><i>Erica cinerea</i> ,<br><i>Erica scoparia</i>                                                        | 716         | 1996-2024 | 13.47    | 0.49  | 0.41  | 0.89  |
| D30S2     | Le Télégraphe         | 4.42  | 43.88 | <i>Cistus albidus</i> ,<br><i>Quercus ilex</i><br><i>Brachiaria ramosa</i> ,<br><i>Buxus sempervirens</i><br><i>Quercus coccifera</i> | 1025        | 1996-2024 | 10.44    | 0.39  | -0.98 | 0.47  |
| D30S3     | Conqueyrac            | 3.89  | 43.92 | <i>Juniperus oxycedrus</i> ,<br><i>Rosmarinus officinalis</i>                                                                         | 60          | 2022-2024 | 14.04    | 0.33  | -0.41 | 0.82  |
| D31S1     | FD Bouconne           | 1.26  | 43.64 | <i>Cistus salviifolius</i> ,<br><i>Erica scoparia</i>                                                                                 | 7           | 2024      | 58.53    | -0.29 | -0.57 | -0.00 |
| D33S1     | Carcan                | -1.14 | 45.09 | <i>Cistus salviifolius</i> ,<br><i>Erica scoparia</i>                                                                                 | 34          | 2023-2024 | 20.76    | 0.62  | 0.31  | 0.78  |
| D33S2A    | Martignas-sur-Jalle   | -0.79 | 44.85 | <i>Calluna vulgaris</i> ,<br><i>Cistus salviifolius</i>                                                                               | 23          | 2024      | 42.43    | 0.19  | -3.56 | 0.78  |
| D33S4     | Le Porge              | -1.19 | 44.86 | <i>Cytisus scoparius</i> ,<br><i>Erica scoparia</i>                                                                                   | 38          | 2023-2024 | 23.24    | 0.70  | 0.40  | 0.80  |
| D33S5A    | Belin-Béliet          | -0.82 | 44.52 | <i>Calluna vulgaris</i> ,<br><i>Erica cinerea</i>                                                                                     | 20          | 2024      | 11.43    | 0.86  | 0.64  | 0.92  |
| D34S1     | Le Bousquet d'Orb     | 3.16  | 43.68 | <i>Erica scoparia</i> ,<br><i>Juniperus oxycedrus</i>                                                                                 | 22          | 2024      | 11.54    | 0.69  | 0.50  | 0.94  |
| D34S2     | Le Puits de l'Aven    | 3.71  | 43.57 | <i>Cistus albidus</i> ,<br><i>Quercus coccifera</i>                                                                                   | 791         | 1999-2024 | 8.67     | 0.47  | -0.05 | 0.50  |
| D34S3     | Montblanc             | 3.34  | 43.37 | <i>Cistus monspeliensis</i> ,<br><i>Juniperus oxycedrus</i>                                                                           | 66          | 2022-2024 | 10.58    | 0.50  | 0.51  | 0.90  |
| D35S2     | Liffré                | -1.57 | 48.18 | <i>Calluna vulgaris</i> ,<br><i>Rhamnus frangula</i>                                                                                  | 16          | 2024      | 33.63    | 0.77  | -3.76 | 0.94  |
| D36S3     | Arthon                | 1.68  | 46.72 | <i>Calluna vulgaris</i> ,<br><i>Erica cinerea</i>                                                                                     | 22          | 2024      | 15.57    | 0.40  | -0.28 | 0.65  |
| D38S1     | Saint Imier           | 5.83  | 45.26 | <i>Cornus glabrata</i> ,<br><i>Juniperus communis</i>                                                                                 | 12          | 2024      | 17.55    | 0.06  | -2.57 | 0.27  |
| D40S1     | Biscarrosse           | -1.22 | 44.46 | <i>Cistus salviifolius</i> ,<br><i>Cytisus scoparius</i>                                                                              | 40          | 2023-2024 | 16.43    | 0.84  | 0.58  | 0.84  |
| D40S2     | Sabres                | -0.76 | 44.12 | <i>Calluna vulgaris</i> ,<br><i>Erica cinerea</i> ,<br><i>Ulex minor</i>                                                              | 29          | 2023-2024 | 16.39    | 0.69  | 0.36  | 0.70  |
| D40S3     | Losse                 | -0.02 | 44.05 | <i>Erica scoparia</i> ,<br><i>Rhamnus frangula</i>                                                                                    | 21          | 2023-2024 | 55.19    | 0.56  | -3.49 | 0.88  |
| D40S5     | Saint-Vincent-de-Paul | -1.01 | 43.77 | <i>Erica scoparia</i> ,<br><i>Ulex europaeus</i>                                                                                      | 27          | 2023-2024 | 34.57    | 0.52  | -1.16 | 0.55  |

Continued on next page

| Site Code | Site Name              | X(°)  | Y(°)  | Sampled Species                                                                           | Sample size | Period    | RMSE (%) | KGE   | NSE    | R     |
|-----------|------------------------|-------|-------|-------------------------------------------------------------------------------------------|-------------|-----------|----------|-------|--------|-------|
| D41S2     | Neuvy                  | 1.58  | 47.58 | <i>Calluna vulgaris</i> ,<br><i>Cytisus scoparius</i>                                     | 18          | 2024      | 34.06    | 0.34  | -1.57  | 0.69  |
| D43S1     | RetThenac              | 4.02  | 45.20 | <i>Calluna vulgaris</i> ,<br><i>Genista purgans</i>                                       | 16          | 2024      | 64.58    | 0.17  | -18.80 | 0.86  |
| D46S1     | FD monclar             | 1.67  | 44.49 | <i>Jasminum fruticans</i> ,<br><i>Phillyrea latifolia</i>                                 | 15          | 2024      | 39.57    | 0.10  | -0.09  | 0.42  |
| D47S3A    | Pompiey                | 0.18  | 44.20 | <i>Cytisus scoparius</i> ,<br><i>Erica scoparia</i>                                       | 19          | 2024      | 50.30    | 0.50  | -0.53  | 0.94  |
| D48S1     | Boussal                | 3.94  | 44.43 | <i>Calluna vulgaris</i> ,<br><i>Genista purgans</i>                                       | 612         | 1997-2024 | 17.39    | -2.15 | -15.38 | 0.12  |
| D48S2     | Vallée Francaise       | 3.82  | 44.15 | <i>Calluna vulgaris</i> ,<br><i>Juniperus oxycedrus</i>                                   | 52          | 2022-2024 | 7.05     | 0.44  | 0.48   | 0.96  |
| D56S3     | Plouhinec              | -3.22 | 47.68 | <i>Erica cinerea</i> ,<br><i>Ulex europaeus</i>                                           | 15          | 2024      | 48.08    | 0.43  | -1.34  | 0.54  |
| D61S2     | Saint-Nicolas-Des-Bois | 0.05  | 43.51 | <i>Calluna vulgaris</i> ,<br><i>Vaccinium myrtillus</i>                                   | 14          | 2024      | 27.79    | 0.20  | -0.19  | 0.67  |
| D64S1     | Anglet                 | -1.50 | 43.51 | <i>Cistus salvifolius</i> ,<br><i>Cytisus scoparius</i> ,<br><i>Ulex europaeus</i>        | 33          | 2023-2024 | 14.48    | 0.88  | 0.81   | 0.95  |
| D66S1     | Le Mas Péricot         | 2.87  | 42.51 | <i>Cistus monspeliensis</i> ,<br><i>Erica arborea</i>                                     | 822         | 1999-2024 | 16.70    | 0.21  | 0.05   | 0.84  |
| D66S2     | Le Vigné               | 2.47  | 42.64 | <i>Cistus monspeliensis</i> ,<br><i>Juniperus oxycedrus</i> ,<br><i>Cytisus scoparius</i> | 884         | 1996-2024 | 20.70    | 0.48  | -0.36  | 0.61  |
| D66S3     | Pezilla                | 2.75  | 42.71 | <i>Cistus monspeliensis</i> ,<br><i>Erica arborea</i>                                     | 28          | 2024      | 13.50    | 0.34  | 0.19   | 0.78  |
| D66S4     | Estavar                | 2.00  | 42.48 | <i>Genista purgans</i> ,<br><i>Juniperus communis</i>                                     | 22          | 2023-2024 | 27.84    | 0.41  | -1.11  | 0.74  |
| D68S1     | Wittelsheim            | 7.21  | 47.79 | <i>Crataegus monogyna</i> ,<br><i>Cytisus scoparius</i>                                   | 13          | 2024      | 44.88    | -0.30 | -2.24  | -0.26 |
| D72S2     | Marigne-Laille         | 0.35  | 47.78 | <i>Calluna vulgaris</i> ,<br><i>Cytisus scoparius</i>                                     | 18          | 2024      | 30.25    | 0.07  | -0.06  | 0.23  |
| D73S1     | Notre Dame du Cruet    | 6.28  | 45.37 | <i>Hippophae rhamnoides</i> ,<br><i>Rosa canina</i>                                       | 14          | 2024      | 15.87    | 0.43  | 0.20   | 0.52  |
| D76S2     | Oissel                 | 1.07  | 49.35 | <i>Calluna vulgaris</i> ,<br><i>Cytisus scoparius</i>                                     | 2           | 2024      | Ø        | Ø     | Ø      | Ø     |
| D77S1     | Fontainebleau          | 2.62  | 48.39 | <i>Calluna vulgaris</i> ,<br><i>Erica cinerea</i>                                         | 22          | 2024      | 34.19    | -0.17 | -3.06  | -0.06 |
| D79S3     | Chizé                  | -0.36 | 46.12 | <i>Crataegus monogyna</i> ,<br><i>Ligustrum vulgare</i>                                   | 22          | 2024      | 27.19    | 0.67  | -0.55  | 0.72  |
| D82S1     | St-antonin-noble-val   | 1.76  | 44.14 | <i>Buxus sempervirens</i> ,                                                               | 10          | 2024      | 112.90   | -0.46 | -1.78  | -0.21 |

Continued on next page

| Site Code | Site Name           | X(°) | Y(°)  | Sampled Species                                                                    | Sample size | Period    | RMSE (%) | KGE   | NSE   | R    |
|-----------|---------------------|------|-------|------------------------------------------------------------------------------------|-------------|-----------|----------|-------|-------|------|
| D83S1     | Le Castellet        | 5.80 | 43.24 | <i>Juniperus communis</i><br><i>Cistus monspeliensis</i> ,<br><i>Erica arborea</i> | 903         | 1996-2024 | 19.82    | 0.40  | 0.10  | 0.58 |
| D83S2     | Le Haras du Rastéou | 6.48 | 43.47 | <i>Cistus albidus</i> ,<br><i>Quercus ilex</i>                                     | 915         | 1996-2024 | 11.41    | 0.75  | -0.33 | 0.78 |
| D83S3     | La Carrière du Juge | 5.99 | 43.42 | <i>Cistus albidus</i> ,<br><i>Cistus monspeliensis</i>                             | 863         | 1997-2024 | 18.95    | 0.39  | 0.45  | 0.79 |
| D83S4     | Pont Des Caunes     | 6.36 | 43.18 | <i>Cistus monspeliensis</i> ,<br><i>Erica arborea</i>                              | 168         | 2018-2024 | 10.53    | 0.57  | 0.62  | 0.83 |
| D83S5     | Gonfaron            | 6.32 | 43.31 | <i>Erica arborea</i> ,<br><i>Juniperus communis</i>                                | 71          | 2022-2024 | 7.10     | 0.48  | 0.36  | 0.61 |
| D84S1     | Mur de la Peste     | 5.14 | 43.90 | <i>Cistus albidus</i> ,<br><i>Quercus coccifera</i><br><i>Quercus ilex</i>         | 862         | 1996-2024 | ∅        | ∅     | ∅     | ∅    |
| D84S2     | Peyrasse            | 5.61 | 43.73 | <i>Quercus ilex</i> ,<br><i>Rosmarinus officinalis</i>                             | 920         | 1996-2024 | 25.11    | -0.83 | -4.19 | 0.71 |
| D84S3     | Cheval-Blanc        | 5.17 | 43.76 | <i>Cistus albidus</i> ,<br><i>Rosmarinus officinalis</i>                           | 20          | 2024      | 24.38    | 0.13  | 0.10  | 0.44 |
| D86S1     | Verneil-Sur-Indre   | 0.52 | 46.69 | <i>Calluna vulgaris</i> ,<br><i>Erica scoparia</i>                                 | 63          | 2023-2024 | 37.35    | 0.29  | -0.99 | 0.50 |

## Supplement 2: Statics and dynamics ISBA predictors

Figure S1 shows maps of metadata extracted from ISBA-LDAS-AROME, including field capacity (WFC in  $m^3/m^3$ ), sand fraction (%), orography ( $m$ ) and rugosity (topographic standard deviation in  $m$ ). These are followed by the dynamic inputs, which are also used as predictors in the neural network. Figure S2 (a) shows the SWI at the third soil layer (10  $m$  in depth), Fig. S2 (b) illustrates the leaf area index (LAI in  $m^2/m^2$ ), and Fig. S2 (c) presents the normalised LAI with the WFC. This figure shows how the dynamic inputs change as a function of the weather conditions by comparing the same variable for two given dates.

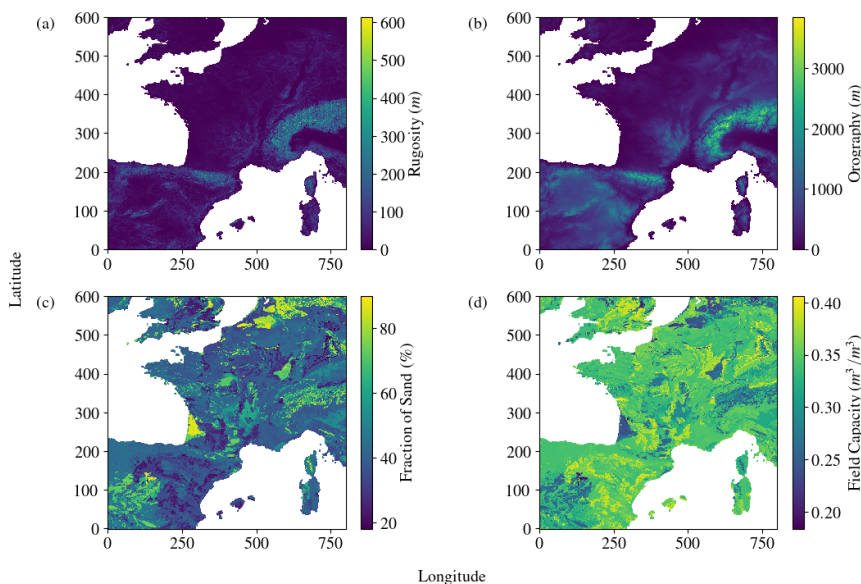

**Figure S1.** Spatial distribution of metadata extracted from ISBA used as model predictors. Four of them are presented: Rugosity in  $m$  (a), Orography in  $m$  (b), Fraction of sand in % (c) and Field capacity in  $m^3/m^3$  (d).

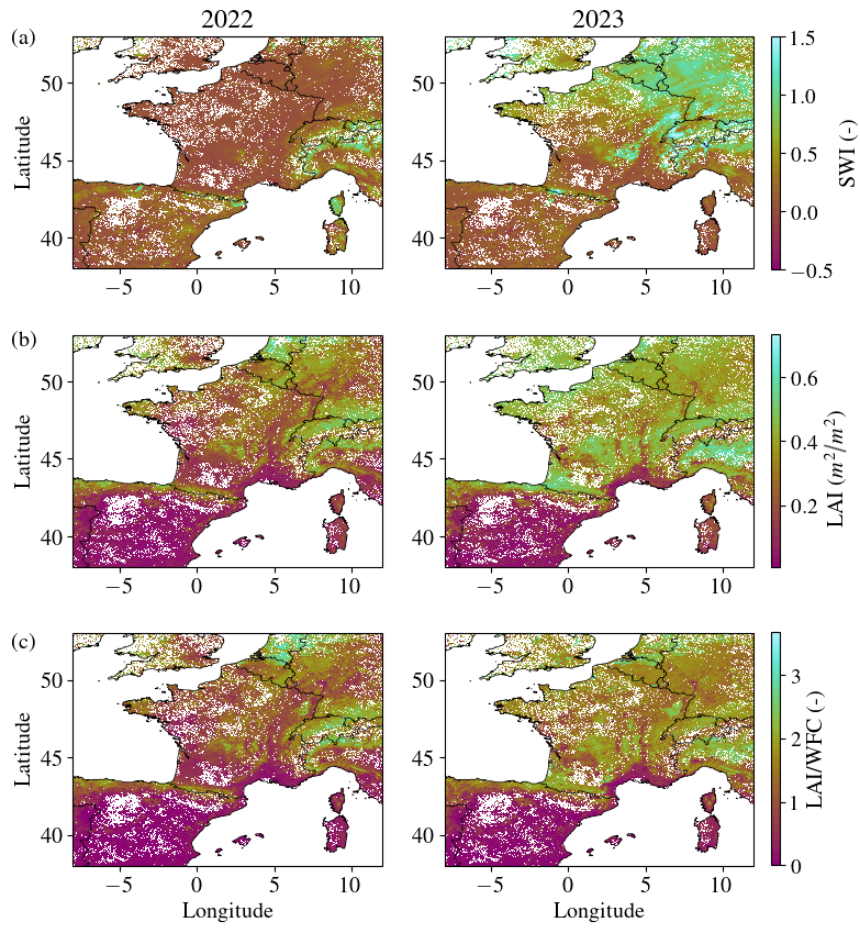

**Figure S2.** Spatial distribution of dynamic inputs from ISBA used as model predictors, comparing August 13 of 2022 and 2023. For the SWI (a), the LAI in  $m^2/m^2$  (b) and the LAI normalised by the WFC (c).

## Supplement 3: Model evaluation on 2024: temporal and spatial extrapolation

15 Table S2 is a summary of both performances of the model over the extended *Réseau hydrique* observations and the historical sites of the network (sites present in the training set). As we can see, the model has strong performance to represent the average of all the historical sites and manages to have a better degree of defining the fluctuation of the values through time.

Despite everything, the model struggles to capture temporal anomalies to the same extent as for the extended network. This lacks extremum search, which could be mitigated by making greater use of temporal depth, for example, contextual temporal variables using an LSTM, a temporal convolutional network, or post-processing of site-specific anomalies with site-by-site temporal calibration.

20 Also, there are two definitions of LFMC. Figure S3 presents the scores of the  $\text{LFMC}_{\text{fresh}}$ , which is the one used to calibrate the model. And Table S2 summarises scores between  $\text{LFMC}_{\text{fresh}}$  and LFMC. Switching from  $\text{LFMC}_{\text{fresh}}$  to  $\text{LFMC}_{\text{dry}}$  tends to amplify the extremes, which is why there has been a drop in performance.

**Table S2.** Model performance across spatial and temporal aspects computed on the full 2024 test set. First, over the entire set, secondly over the historical area of the Réseau Hydrique, thirdly based on the  $\text{LFMC}_{\text{fresh}}$  used by the ONF and operational services.

| LFMC evaluation experiment                                                                     | RMSE % | KGE  | NSE  | Pearson $R$ | Number of points |
|------------------------------------------------------------------------------------------------|--------|------|------|-------------|------------------|
| <b>Neural network prediction over 2024</b>                                                     |        |      |      |             |                  |
| Overall performances                                                                           | 25.2   | 0.70 | 0.62 | 0.79        | 916              |
| Site-averaged                                                                                  | 17.5   | 0.76 | 0.74 | 0.87        | 92               |
| Temporal anomalies                                                                             | 4.0    | 0.37 | 0.38 | 0.63        | 916              |
| <b>Neural network prediction over sites present in the training set</b>                        |        |      |      |             |                  |
| Overall performances                                                                           | 16.9   | 0.77 | 0.70 | 0.84        | 916              |
| Site-averaged                                                                                  | 9.2    | 0.86 | 0.85 | 0.93        | 92               |
| Temporal anomalies                                                                             | 4.1    | 0.36 | 0.44 | 0.67        | 916              |
| <b>Neural network prediction over 2024 exprimed in <math>\text{LFMC}_{\text{fresh}}</math></b> |        |      |      |             |                  |
| Overall performances                                                                           | 5.4    | 0.74 | 0.66 | 0.81        | 916              |
| Site-averaged                                                                                  | 3.8    | 0.81 | 0.77 | 0.88        | 92               |
| Temporal anomalies                                                                             | 3.9    | 0.55 | 0.38 | 0.63        | 916              |

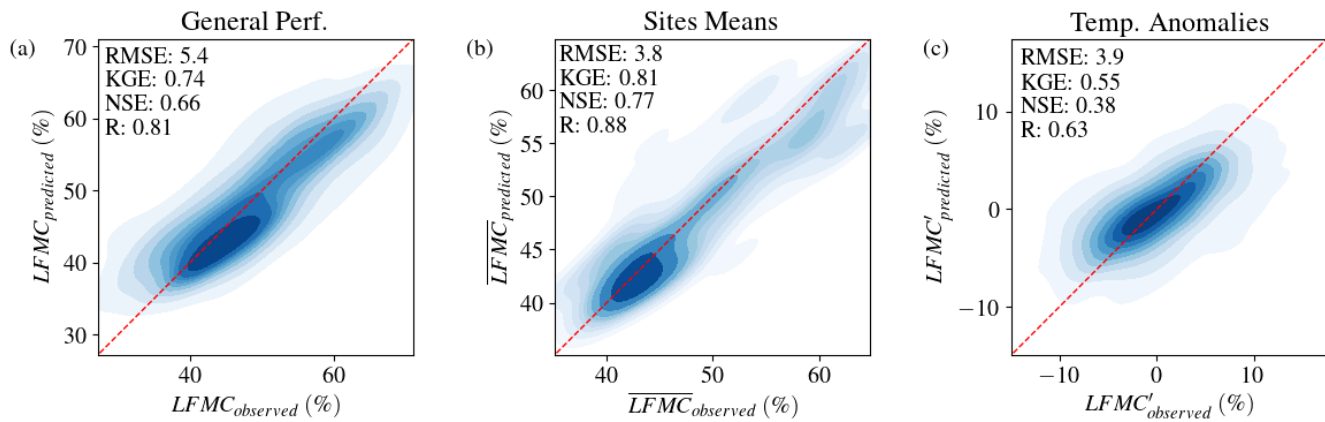

**Figure S3.** Scatter plots (joint density) of  $LFMC_{fresh}$  predictions vs. observations for the 2024 test set. (a) General Performances, (b) Sites Means, (c) Temporal correlation

## Supplement 4: Selection of the reference drought day

The date of 13 August 2022 was not chosen at random. The neural network model was applied to the entire summer of 2022, and grid cells with unrealistic values were masked. The date with the lowest spatially averaged LFMC value across the AROME grid was then selected as the reference day. This corresponds to the minimum live fuel moisture content, as illustrated in Fig. S4.

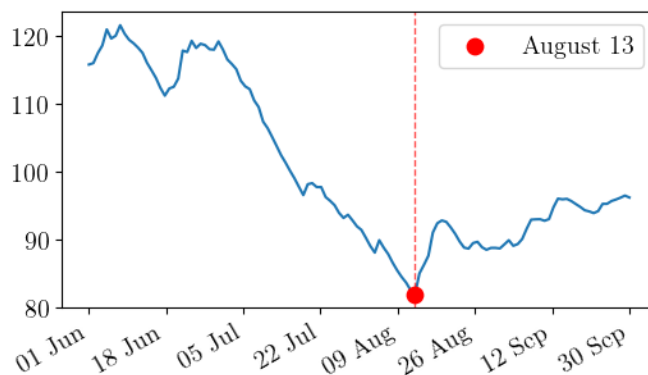

**Figure S4.** Spatially averaged LFMC evolution during summer 2022. The dashed vertical line indicates the date (13 August) corresponding to the minimum mean LFMC value over the domain.

## Supplement 5: Effect of the number of parameters in the neural network

We investigate how model depth and latent dimensionality affect performance under different cross-validation schemes. Several neural network configurations were evaluated to assess the trade-off between model complexity and generalisation capability:

- Reference model — latent dimension of 4, approximately 7,000 parameters.
- 35 – Shallow 3-layer network — three dense layers (two of 32 units, one output), for a total of approximately 1,400 parameters, similar to the architecture used in Corchia (2024).
- Small latent model — The architecture with a latent dimension of 2, corresponding to 2,000 trainable parameters.
- Deep model — same structure with a latent dimension of 8, totalling 26,000 trainable parameters.

40 The results of all experiments, for the different validation strategies, are summarised in Table S3. The comparison highlights the influence of both model depth and the number of trainable parameters on predictive performance. Increasing model capacity improves the representation of complex spatio-temporal dependencies, but may also lead to overfitting when the number of parameters greatly exceeds the effective sample size. The intermediate configuration ( $\sim 7,000$  parameters) was selected as the best compromise between expressivity and stability, ensuring a balanced ratio between model complexity and input feature dimensionality.

**Table S3.** Performance comparison between a three-layer neural network and the proposed neural network with varying latent dimensionalities (2, 4, and 8). The best score values are highlighted in bold.

| Metric\Model                | The studied neural network | 3-Layers neural network | The studied neural network (small latent) | The studied neural network (big latent) |
|-----------------------------|----------------------------|-------------------------|-------------------------------------------|-----------------------------------------|
| <b>Globals Performances</b> |                            |                         |                                           |                                         |
| RMSE (%)                    | <b>25.2</b>                | 28.3                    | 26.4                                      | 26.5                                    |
| KGE                         | 0.70                       | 0.66                    | <b>0.72</b>                               | 0.64                                    |
| NSE                         | <b>0.62</b>                | 0.52                    | 0.58                                      | 0.58                                    |
| Pearson <i>R</i>            | <b>0.79</b>                | 0.73                    | 0.78                                      | <b>0.79</b>                             |
| <b>Forward Chaining</b>     |                            |                         |                                           |                                         |
| RMSE (%)                    | <b>22.7</b>                | 27.5                    | 22.9                                      | <b>22.7</b>                             |
| KGE                         | <b>0.52</b>                | 0.03                    | 0.50                                      | 0.51                                    |
| NSE                         | 0.08                       | -0.14                   | <b>0.12</b>                               | 0.08                                    |
| Pearson <i>R</i>            | <b>0.59</b>                | 0.32                    | 0.58                                      | <b>0.59</b>                             |
| <b>Leave One Year Out</b>   |                            |                         |                                           |                                         |
| RMSE (%)                    | 18.5                       | 23.3                    | 18.7                                      | <b>18.4</b>                             |
| KGE                         | <b>0.57</b>                | 0.29                    | 0.53                                      | <b>0.57</b>                             |
| NSE                         | <b>0.41</b>                | 0.15                    | 0.40                                      | <b>0.41</b>                             |
| Pearson <i>R</i>            | <b>0.67</b>                | 0.51                    | <b>0.67</b>                               | <b>0.67</b>                             |
| <b>Leave One Site Out</b>   |                            |                         |                                           |                                         |
| RMSE (%)                    | <b>20.3</b>                | 28.5                    | <b>20.3</b>                               | <b>20.3</b>                             |
| KGE                         | <b>0.58</b>                | 0.18                    | 0.57                                      | 0.57                                    |
| NSE                         | <b>0.40</b>                | -2.19                   | 0.39                                      | <b>0.40</b>                             |
| Pearson <i>R</i>            | 0.72                       | 0.59                    | <b>0.73</b>                               | 0.72                                    |
| <b>New 2024 ONF Sites</b>   |                            |                         |                                           |                                         |
| RMSE (%)                    | <b>35.4</b>                | 40.6                    | 36.7                                      | 36.2                                    |
| KGE                         | 0.47                       | 0.42                    | 0.43                                      | <b>0.54</b>                             |
| NSE                         | <b>0.32</b>                | 0.11                    | 0.27                                      | 0.29                                    |
| Pearson <i>R</i>            | <b>0.60</b>                | 0.49                    | 0.57                                      | 0.58                                    |

## Supplement 6: Canton scale of the French territory

Figure S5 presents the spatial delineation of the 2,378 French cantons as defined in the 2015 administrative zoning. The map is used as a reference spatial framework for the analyses presented in the study, providing a homogeneous partition of the territory. Available from IGN at <https://geoservices.ign.fr/geofla>.

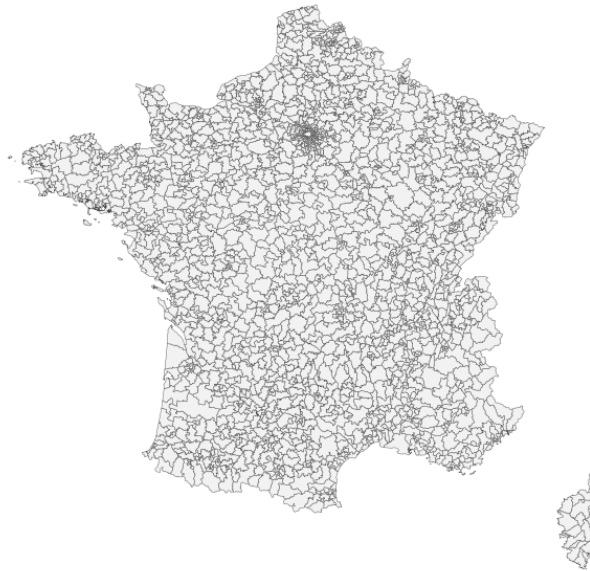

**Figure S5.** Spatial delineation of the French cantons (2015).

## 50 **Supplement 7: Optimisation of station deployment strategy**

We have introduced the rationale for expanding the ONF *Réseau Hydrique* network by using a prioritisation score that combines model uncertainty, the temporal variability of LFMC and the distance to existing sites. Here, we present the methodological details that underlie this prioritisation analysis.

For each AROME grid cell, an *Interest Score* (IS) was computed as a weighted combination of three spatial indicators:

$$55 \quad IS = \alpha U + \beta \sigma_{LFMC} + \gamma D$$

where,  $U$  is the model uncertainty, quantified as the inter-model standard deviation of LFMC predictions obtained from multiple independent neural network trainings,  $\sigma_{LFMC}$  is the temporal standard deviation of LFMC, representing vegetation sensitivity to drought,  $D$  is the Euclidean distance to the nearest ONF field site, and  $\alpha$ ,  $\beta$ , and  $\gamma$  are weighting coefficients empirically set to balance the contribution of each component.

60 All predictors were first normalised to the [0, 1] range to avoid scale effects. Higher IS values thus correspond to regions where the model exhibits higher uncertainty, stronger seasonal variability, and lower observational constraints.

The computed IS field was subsequently classified using a K-means clustering ( $K = 2$ ), resulting in three categories of interest:

1. **Low priority:** regions already well constrained by existing stations,
2. **High priority:** areas simultaneously exhibiting high model uncertainty and weak observational coverage.

65 This classification provides an objective spatial framework to guide the deployment of new monitoring stations, ensuring both spatial and ecological representativeness of the observational network.

The northern and north-western parts of France emerged as under-represented areas where additional LFMC observations would most improve model robustness. Conversely, southern France and Corsica already show dense observational coverage and consequently lower interest scores. This simple scoring approach demonstrates the potential of AI-based LFMC mapping  
70 to support data-driven network design and adaptive monitoring strategies.

Although the current approach is exploratory, it provides a solid foundation for future integration with formal *Optimal Sensor Placement* (OSP) techniques (Caselton and Zidek, 1984). OSP frameworks aim to identify observation locations that maximise information gain or minimise model uncertainty under spatial and logistic constraints. Incorporating such methodologies (e.g. entropy-based, variance reduction, or information-theoretic approaches) could transform the present heuristic IS formulation  
75 into a fully optimised decision-support system.

Future developments may also include additional variables such as vegetation type, accessibility, or fire risk indicators, allowing a multi-objective optimisation of the ONF monitoring network at the national scale.

## Supplement 8: Impact of the day of the year

The Day of the Year (DOY) is one of the pieces of metadata used by the model to estimate LFMC. This information introduces seasonality, but this can be discussed.

We will therefore try to exclude this information from the training process in order to determine its influence on the scores. To do so, we will conduct another training 'without DOY'. First, however, we will compare the actual model with the full 2024 set, and then with the historical set (sites extracted from the training set).

As shown in Table S4, DOY contains a lot of information, and most scores decrease when temporal anomalies are considered, especially the KGE, which is highly sensitive to temporal dynamics. This suggests that the seasonality conveyed by this predictor cannot be ignored, particularly when no other temporal information is available. Figures S6 and S7 show how the model performs without DOY as a predictor for LFMC<sub>fresh</sub> and LFMC.

**Table S4.** Model performance across spatial and temporal aspects computed on the full 2024 test set. First, over the entire set and secondly over the historical area of the Réseau Hydrique, with and without the day of the year used as a predictor.

| LFMC evaluation experiment          | RMSE % | KGE  | NSE  | Pearson <i>R</i> | Number of points |
|-------------------------------------|--------|------|------|------------------|------------------|
| <b>All the set</b>                  |        |      |      |                  |                  |
| Overall performances                | 25.2   | 0.70 | 0.62 | 0.79             | 916              |
| Site-averaged                       | 17.5   | 0.76 | 0.74 | 0.87             | 92               |
| Temporal anomalies                  | 4.0    | 0.37 | 0.38 | 0.63             | 916              |
| <b>All the set without DOY</b>      |        |      |      |                  |                  |
| Overall performances                | 26.8   | 0.68 | 0.57 | 0.76             | 916              |
| Site-averaged                       | 18.9   | 0.78 | 0.70 | 0.84             | 92               |
| Temporal anomalies                  | 4.1    | 0.22 | 0.33 | 0.58             | 916              |
| <b>Historical sites</b>             |        |      |      |                  |                  |
| Overall performances                | 16.9   | 0.77 | 0.70 | 0.84             | 588              |
| Site-averaged                       | 9.2    | 0.86 | 0.85 | 0.93             | 52               |
| Temporal anomalies                  | 4.1    | 0.36 | 0.44 | 0.67             | 588              |
| <b>Historical sites without DOY</b> |        |      |      |                  |                  |
| Overall performances                | 17.3   | 0.72 | 0.69 | 0.83             | 588              |
| Site-averaged                       | 9.3    | 0.84 | 0.85 | 0.92             | 52               |
| Temporal anomalies                  | 4.1    | 0.23 | 0.42 | 0.65             | 588              |

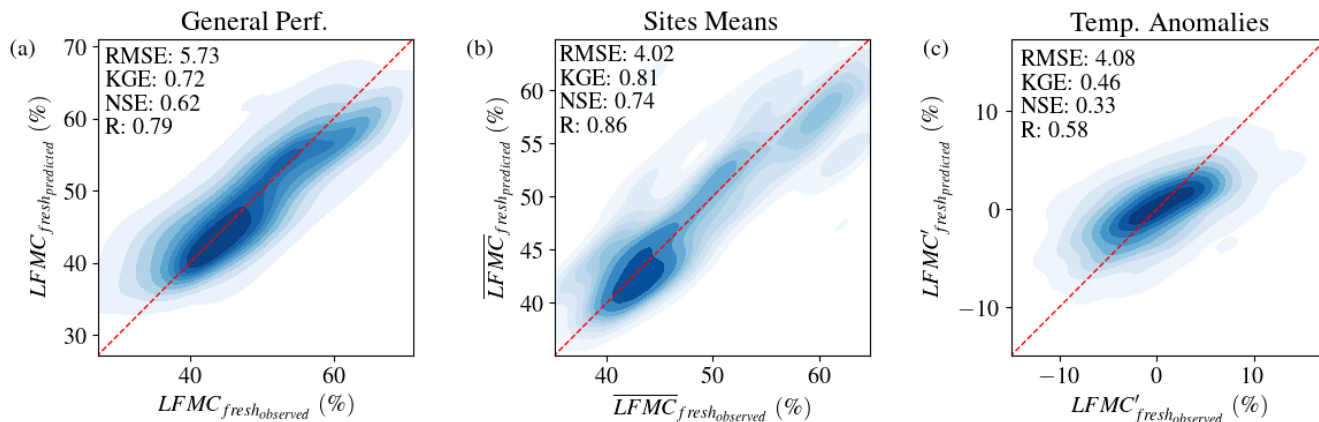

**Figure S6.** Scatter plots of  $LFMC_{fresh}$  without the DOY predictions vs. observations for the 2024 test set. (a) General Performances, (b) Sites Means, (c) Temporal correlation

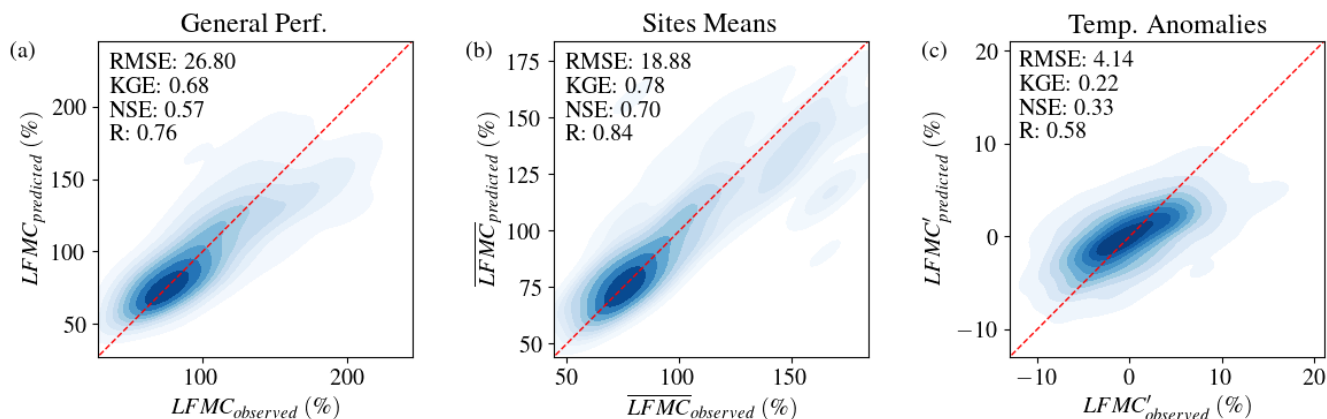

**Figure S7.** Scatter plots of  $LFMC$  without the DOY predictions vs. observations for the 2024 test set. (a) General Performances, (b) Sites Means, (c) Temporal correlation

## References

- Casleton, W. and Zidek, J.: Optimal monitoring network designs, *Statistics Probability Letters*, 2, [https://doi.org/10.1016/0167-7152\(84\)90020-8](https://doi.org/10.1016/0167-7152(84)90020-8), 1984.
- Corchia, T.: Contribution of machine learning to the integration of satellite observations into a global model of the soil-plant system, *Theses*, Université de Toulouse, <https://theses.hal.science/tel-04848876>, 2024.
